# Supplementary material for: Costs and Complications of Extracorporeal Membrane Oxygenation Therapy in Australia and New Zealand
Source: Research Square preprint supplement (doi:10.21203/rs.3.rs-8586173/v1), 2026-01-22

Costs and Complications of Extracorporeal Membrane Oxygenation Therapy in Australia and New Zealand

Dr Kate R. Wilcox, Ms Alayna Carrandi, Dr Aidan Burrell, Mr Bentley Fulcher, Professor Carol L. Hodgson, Dr Alisa M. Higgins on behalf of the EXCEL management committee

# **Additional File 4: Supplementary Figures**

## **eFigure 1: PRISMA Flow Chart of Exclusions, Missing Data and Patient Mortality**

Total patients in dataset = 1,406

Total patients included in analysis = 1,345

Survived to hospital discharge = 762

Confirmed survivors at day 365 = 563

Died prior to hospital discharge = 583

Died prior to day 365 follow up = 20

Lost to follow up = 42

Missing day 365 follow up data = 137

Patients excluded:

No baseline demographic details = 18

No ECMO start date time = 35

RVAD only without oxygenator = 8

## **eFigure 2: Clinician Survey Template for Timing Estimates of Key ECMO Procedures**


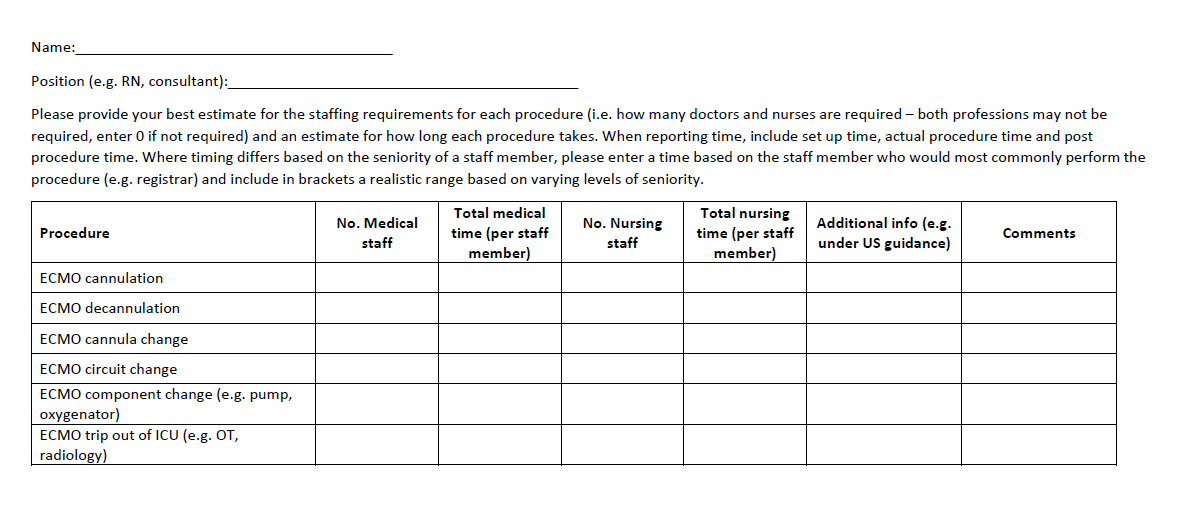

Supplement: Supplementary file 1 [file 6aa794db284a48e6370f5d65.docx]
