# Supplementary material for: Costs and Complications of Extracorporeal Membrane Oxygenation Therapy in Australia and New Zealand
Source: Research Square preprint supplement (doi:10.21203/rs.3.rs-8586173/v1), 2026-01-22
Supplement: Supplementary file 2 [file 7aff687f09aea0ef894e448f.docx]

Costs and Complications of Extracorporeal Membrane Oxygenation Therapy in Australia and New Zealand

Dr Kate R. Wilcox, Ms Alayna Carrandi, Dr Aidan Burrell, Mr Bentley Fulcher, Professor Carol L. Hodgson, Dr Alisa M. Higgins on behalf of the EXCEL management committee

## **Additional File 1: List of EXCEL Sites and Further Acknowledgements**

**List of EXCEL Sites**

| Alfred Hospital |
| --- |
| Auckland Hospital |
| Austin Hospital |
| Box Hill Hospital |
| Canberra Hospital |
| Epworth Healthcare |
| Fiona Stanley Hospital |
| Flinders Medical Centre |
| Gold Coast University Hospital |
| John Hunter Hospital |
| Launceston Hospital |
| Liverpool Hospital |
| Monash Medical Centre/Victorian Heart Hospital |
| Prince Charles Hospital |
| Prince of Wales Hospital |
| Princess Alexandra Hospital |
| Royal Adelaide Hospital |
| Royal Brisbane and Women’s Hospital |
| Royal Melbourne Hospital |
| Royal North Shore Hospital |
| Royal Prince Alfred Hospital |
| Sir Charles Gairdner Hospital |
| St George Hospital |
| St Vincent’s Hospital - Melbourne |
| St Vincent’s Hospital - Sydney |
| Sunshine Coast University Hospital |
| Townsville Hospital |
| University Hospital Geelong |
| Westmead Hospital |

**Further Acknowledgements**

**EXCEL Management Committee:** Carol Hodgson, Shannah Anderson, Stephen Bernard, Jasmin Board, Dan Brodie, Heidi Buhr, Aidan Burrell, Jamie Cooper, Craig Dicker, Eddy Fan, John Fraser, David Gattas, Alisa Higgins, Ingrid Hopper, Sue Huckson, Natalie Linke, Ed Litton, Shay McGuiness, Priya Nair, Neil Orford, Rachael Parke, Vincent Pellegrino, David Pilcher, Dion Stub, Andrew Udy, Benjamin Reddi, Tony Trapani, Annalie Jones, Bentley Fulcher.

**Consumers**: The EXCEL Registry acknowledges the individual and collective expertise of those with a lived experience of critical illness. Monash University, Melbourne, Vic: Shannah Anderson and Craig Dicker.

**Outcome Assessors**: All follow up assessments were completed thanks to trained Outcome Assessors. Monash University, Melbourne, Vic: Pamela Butt, Laura Johanson and Liz Melgaard. Auckland City Hospital, Auckland, New Zealand: Katie Brooks, Magdalena Butler, Keri-Anne Cowdrey, Eileen Gilder, Katie Gill, Alix Gray, Brittany Mason, Phillipa Neal, Rachael Parke, Melissa Robertson, Laura Vui, Hannah Ward and Laura Weis.

**Collaborators**: This work was completed with thanks to the EXCEL Investigators, International ECMO Network, Australian and New Zealand Intensive Care Society Clinical Trials Group, Alfred Hospital, Melbourne, Vic: Laura Adams, Jasmin Board, Aidan Burrell, Annalie Jones, Emma Martin, Vincent Pellegrino, Jayne Sheldrake and Andrew Udy; Auckland City Hospital, Auckland, New Zealand: Magdalena Butler, Keri-Anne Cowdrey, Eileen Gilder, Katie Gill, Alix Gray, Brittany Mason, Alastair McGeorge, Shay McGuinness, Andrew McKee, Phillipa Neal, Rachael Parke, Melissa Robertson, Laura Vui, Hannah Ward and Laura Weiss; Austin Hospital, Melbourne, Vic: Rinaldo Bellomo, Glenn Eastwood, Caleb Fisher, Andrew Hilton, Ary Serpa Neto, Leah Peck and Helen Young; Box Hill Hospital, Melbourne, Vic: James Bridgett, Debbie Brown, Geraldine Cook, John Dyett, Kym Gellie, Arun Ilancheran, Cheelim Liew, Nicole Robertson and Joanne Zhou; Canberra Hospital, ACT: Susan Donnelly, Tash Edmunds, Joshua Heard, Sebastian Lijo, Bree McDonald, Mary Nourse, Sumeet Rai, Manoj Singh, Hemanth Hurkadli Veerendra and Tina Xu; Epworth Hospital, Melbourne, Vic: Jonathan Barrett, Kyle Brooks, Gabrielle Hanlon and Laurie Saffer; Fiona Stanley Hospital, Perth, WA: Chris Allen, Nicholas Anthony, Samantha Bizzell, Edward Litton, Annamaria Palermo and Susan Pellicano; Flinders Medical Centre, Adelaide, SA: Andrew Bersten, Shailesh Bihari, Julia Brown, Sharon Comerford, Laura Grear, Joanne McIntyre, Xia Jin, and Ubbo Wiersema; Gold Coast University Hospital, Gold Coast, Qld: Dee Figures, Maimoonbe Gough, Maree Houbert, James McCullough, Julie Pitman, Mandy Tallott and James Winearls; John Hunter Hospital, Newcastle, NSW: Jorge Brieva, Sarah Dalton and Amber-Louise Poulter; Launceston General Hospital, Launceston, Tas: Matthew Brain, Jo Chen, Laurie McKeon, Sarah Mineall, Tarnya Trezise and Maria Unwin; Liverpool Hospital, Sydney, NSW: Anders Aneman, Danielle Austin, Peter McCanny and Jennene Miller; Monash Health, Melbourne, Vic: Yolanda Cox, Brendan Murfin and Yayha Shehabi; Monash University, Melbourne, Vic: Patrica Alliegro, Michael Bailey, Stephen Bernard, Simon Cumming, Amanda Brown, D James Cooper, Bentley Fulcher, Alisa Higgins, Carol Hodgson, Ingrid Hopper, Natalie Linke, David Pilcher, Dion Stub and Tony Trapani; Prince Charles Hospital, Brisbane, Qld: Rachel Bushell, John Fraser, Jayshree Lavana, Dawn Lockwood, Raymond Marteene and Dr Dinesh Parmar; Prince of Wales Hospital, Randwick, NSW: Gavin Salt and Solomon Thambiraj; Princess Alexandra Hospital, Brisbane, Qld: Megan Davis, Meg Harward, Cassie Jones, Chris Joyce, Josie Mackay, Jason Meyer, and James Walsham; Royal Adelaide Hospital, Adelaide, SA: Paola Arce-Arango, Nerissa Brown, Connor Christie, Sarah Doherty, Sophie Dohnt, Mahni Foster, Kathleen Glasby, Fiona McDonald, Stephanie O’Connor, Benjamin Reddi, Justine Rivett and Joannies Yap; Royal Brisbane and Women’s Hospital, Brisbane, Qld: Debra Bristow, Jason Pincus, Janine Stuart and Nadine vonGrabill; Royal Melbourne Hospital, Melbourne, Vic: James Anstey, Deborah Barge, Menoly Butler, Bradley Gebbie and Katherine Munro; Royal North Shore Hospital, Sydney, NSW: Frances Bass, Rosalind Eliott, Pierre Janin, Naomi Hammond, Anne O’Connor, Kieron Potger and Elizabeth Yarad; Royal Prince Alfred Hospital, Sydney, NSW: Maryam Alborzi, Heidi Buhr, Ruaidhri Carey, Jennifer Coles, Stuart Duffin, David Gattas, Olivia Evangelisti, Bronwyn Kelly, Cindy Liang, Li Lok, Timothy Southwood, Richard Totaro, Carla Walsh and Elliott Worku; Sir Charles Gairdner Hospital, Perth, WA: Matthew Anstey, Anthadene Endemann, Sarah Hardy, Bhuamik Mevavala, Roxana Popa, Stephen Richards, Lara Rock and Bradley Wibrow; St George Hospital, Sydney, NSW: Sarah Jones, Sarah Valle and Mark Weeden; St Vincent’s Hospital Melbourne, Melbourne Vic: Leanne Barbazza, Barry Dixon, Jennifer Holmes, Patricia Hurune and Yvette O’Brien; St Vincent’s Hospital Sydney, Sydney, NSW: Hergen Buscher, Alexandra Campion, Amelia Hall, Sarah Henstridge, Amelia Liu, Priya Nair, Sally Newman and Claire Reynolds; Sunshine Coast University Hospital, Sunshine Coast, Qld: Cale Brookes, Peter Garrett and Lauren Murray; Townsville University Hospital, Townsville, Qld: Karen Carson, Siva Senthuran, Stephen Whebell, Melanie White and April Win; University Hospital Geelong, Geelong, Vic: Allison Bone, Samantha Breguet, Simone Fitzgerald, Meg Gallagher, Bradley Gebbie, Stacey Hawker, Michelle Horton, Nima Kakho, Joe McCaffrey, Martina Nichonghaile, Neil Orford, Lucy Range and Jemma Trickey; Westmead Hospital, Sydney, NSW: Ashoke Bannerjee, David Bowen, Louise Cope, Eleanore Clark-Mackay, Benjamin Davidson, James Hambly, Jenyfer Joy, Natalie Kruit, Jing Kong and Catherine Linh.
