# Supplementary material for: Costs and Complications of Extracorporeal Membrane Oxygenation Therapy in Australia and New Zealand
Source: Research Square preprint supplement (doi:10.21203/rs.3.rs-8586173/v1), 2026-01-22
Supplement: Supplementary file 3 [file 9f8c163b7f2d113f15c6deef.docx]

Costs and Complications of Extracorporeal Membrane Oxygenation Therapy in Australia and New Zealand

Dr Kate R. Wilcox, Ms Alayna Carrandi, Dr Aidan Burrell, Mr Bentley Fulcher, Professor Carol L. Hodgson, Dr Alisa M. Higgins on behalf of the EXCEL management committee

## **Additional File 2: Further Methodological Explanation of Costing**

*Organ supports*

Daily ICU costs were based on the maximum number of organ supports for each patient for each day they were in ICU. Organ supports included in costing were vasopressors, mechanical ventilation and renal replacement therapy. Daily ICU costs were based on the maximum number of organ supports for each patient for each day they were in ICU. Organ supports included in costing were vasopressors, mechanical ventilation and renal replacement therapy. If a patient was on any of these supports during the included study day they were costed for the entire day. Total organ supports could be between 0 (no vasopressors, mechanical ventilation or renal replacement therapy) and 3 (vasopressors, mechanical ventilation and renal replacement therapy). Whilst we considered ECMO to be an additional organ support, this equipment and staffing was costed separately and as such not included in this calculation. Duration of ventilation and renal replacement therapy were determined based on start and stop dates for each patient. Data for vasopressor use in the database were only collected for the first seven days of ECMO as a binary yes or no outcome on days one, three and seven. The maximum days were assumed when a patient was on vasopressors at either day one or three but not on vasopressors at the subsequent data point. For example, a patient who was identified as being on vasopressors at day three but not on vasopressors at day seven was assumed to have six days of vasopressors unless they came off ECMO or this was logistically impossible (e.g. they had died). Several patients without ventilation stop dates were noted to be transferred from the ICU with tracheostomies in situ. These patients were assumed to be ventilated until ICU discharge.

Based on the National Schedule of NHS Costs 2019/20 for Adult Critical Care patients (using data for either medical or surgical adult patients (unspecified specialty), a cost per patient per ICU day was determined for adult ICU patients on 0, 1, 2 and 3 organ supports [E1]. Each organ support cost was then divided by the mean cost per patient per ICU day to give a weighted factor that was applied to the mean Australian daily ICU cost, resulting in an Australian-specific daily ICU cost weighted by number of organ supports [E2].

*Procedure costs*

ECMO cannulation and decannulation were costed based on whether cannulation was central or peripheral. Central ECMO was defined as access or return cannula sites in either the aorta, left atrium, right atrium, subclavian artery or vein, pulmonary vein, or left ventricle. Central ECMO requires two theatre trips – one for cannulation and one for decannulation – unless the patient dies prior to decannulation. Veno-pulmonary artery (VPA) ECMO was costed based on the assumption that a theatre trip for central cannulation was required but peripheral decannulation could be performed in ICU without a second theatre trip. Patients who underwent central ECMO cannulation who did not have a theatre trip listed within three hours of ECMO commencement or decannulation had an additional trip added to capture this. Patients who underwent VPA ECMO without a theatre trip documented within three hours of ECMO commencement also had an additional theatre trip included in costing.

Central ECMO cannulation and decannulation was an average of real-world costs from 13 patients across two major Australian ECMO sites who were commenced on ECMO in 2019. Peripheral ECMO cannulation and decannulation, cannula change, and circuit change costs were a based-on equipment and staffing requirements as determined by survey results from 18 ECMO clinician specialists from across Australia. Equipment costs were averaged from six major ECMO centres across two states. Patients who died in hospital with missing ECMO decannulation dates or missing ICU discharge dates were assumed to be on ECMO and in ICU until the time of their death.

*Machine costs*

Machine costs were a mean of costs sourced in confidence from three major Australian ECMO sites. An assumed five percent depreciation over ten years was used to determine a yearly depreciation value (cost) which was divided by 365 to get a daily cost. Given that ECMO machines are not always in use, a more accurate assessment of cost was daily cost per ECMO day. The average percentage of time in use for each ECMO machine (for ECMO use specifically e.g. not for cardiopulmonary bypass etc.) was determined by dividing the total number of machine days in use for ECMO (based on clinician estimates from four major Australian ECMO centres) by the total number of available ECMO days (number of machines multiplied by 365).

*Intra-hospital trips*

Intra-hospital trips to theatre and radiology were included in costing, noting the resource intensive nature of transporting ECMO patients with the most significant cost being skilled staff. Data were collected on number and timing of trips for patients on ECMO. Based on survey results from 18 specialist clinicians from across Australia, an average number and duration of staff time for transport was calculated (see eFigure 2). All patients undergoing central cannulation and decannulation were costed for a theatre trip for each of these procedures unless they had died prior to decannulation.

*Retrievals*

Retrievals were costed based on mode and location (state) of retrieval. Specific data for New South Wales and Victoria was applied to patients retrieved to ECMO centres in these states and an average retrieval cost was applied to states outside of these jurisdictions. New South Wales Ambulance provided individual pre-hospital retrieval costs for 121 established or potential ECMO patients throughout 2019 and 2020 and this was used to determine a mean cost for patients retrieved via road and air in NSW. Ambulance Victoria provided overall cost estimates of road and air retrieval which included staffing and platform costs based on an assumption of five hours per retrieval (as per specialist retrieval clinician average estimate across rural and metropolitan retrievals).

*Emergency department and rehabilitation*

Emergency department costs and rehabilitation costs were sourced from the NHCDC Public Sector Report 2021-22. Emergency department costs were a fixed cost per admission based on categories most appropriately aligned with the mode of ECMO a patient received. Rehabilitation costs were costed according to patients’ key diagnoses with specific costs for amputation, stroke, and spinal cord dysfunction. Duration of rehabilitation was taken from average rehabilitation length of stay with consideration to 180- and 360-day outcomes (e.g. if patient had died prior to expected discharge or conversely if they were still in rehabilitation beyond expected discharge).

*Blood products*

Blood product costs were sourced from the National Blood Associations Annual Reports (2021/22) and multiplied by individual patient blood product usage.

# **References**

| [E1] | National Health Service, “National Cost Collection: National Schedule of NHS costs - Year 2019-20 - NHS trust and NHS foundation trusts,” National Health Service, London, 2021. |
| --- | --- |
| [E2] | P. Hicks, “The financial cost of intensive care in Australia: a multicentre registry study,” *Med J Aust.,* vol. 211, no. 7, pp. 324-325, 2019. |
