# Supplementary material for: Costs and Complications of Extracorporeal Membrane Oxygenation Therapy in Australia and New Zealand
Source: Research Square preprint supplement (doi:10.21203/rs.3.rs-8586173/v1), 2026-01-22
Supplement: Supplementary file 4 [file c17dfddbe51504483ab79f17.docx]

Costs and Complications of Extracorporeal Membrane Oxygenation Therapy in Australia and New Zealand

Dr Kate R. Wilcox, Ms Alayna Carrandi, Dr Aidan Burrell, Mr Bentley Fulcher, Professor Carol L. Hodgson, Dr Alisa M. Higgins on behalf of the EXCEL management committee

## **Additional File 3: Overview of Input Costs**

|  | **Cost (Australian Dollars 2021/22)** | | | **Source and/or Calculation** |
| --- | --- | --- | --- | --- |
| *Retrieval costs, total costs* | *Victoria (1)* | *New South Wales (2)* | *Other Australian States/ New Zealand (3)* |  |
| Road, off ECMO | $4,339.14 | $4,818,82 | $4,578.98 | (1) Adult Retrieval Victoria costs from 2020/2021, based on expert estimation that average retrieval time is 5 hours  (2) Mean cost from 121 individual retrieval estimations for all established or potential ECMO patients retrieved by New South Wales ambulance in 2019/2020  (3) Mean cost of Victoria and New South Wales |
| Road, on ECMO | $4,339.14 | $6,044.96 | $5,192.05 |
| Air, off ECMO | $9,002.88 | $11,560.40 | $10,281.64 |
| Air, on ECMO | $9,002.88 | $15,789.67 | $12,396.28 |
| *Staffing costs, per hour1* | *Victoria (1)* | *New South Wales (2)* | *Other Australian States/ New Zealand (3)* |  |
| Intensivist | $145.42 | $104.90 | $106.99 | (1) AMA Victoria Medical Specialists Agreement 2018-2021, Staff specialist, year 4 [E3]  (2) New South Wales Industrial Relations Commission Staff Specialist Award 2019, year 4 [E4]  (3) Queensland Industrial Relations Commission Medical Officers’ Certified Agreement 2018, Staff specialist, senior (L21) [E5] |
| Registrar | $60.28 | $63.06 | $64.54 | (1) AMA Victoria Medical Specialists Agreement 2018-2021, Registrar, year 3 [E3]  (2) Health Professional and Medical Salaries State Award 2019, Registrar, year 3 [E6]  (3) Queensland Industrial Relations Commission Medical Officers’ Certified Agreement 2018, Registrar, year 3 [E5] |
| ECMO nurse | $63.80 | $62.67 | $62.24 | (1) Nurses and Midwives (Victorian Public Sector) (Single Interest Employers) Enterprise Agreement 2020-2024, Nurse unit manager, level 2 (ICU nurse) [E7]  (2) New South Wales Industrial Relations Commission Public Health System Nurses’ and Midwives’ Award 2019, Nurse unit manager, level 2 [E8]  (3) Queensland Industrial Relations Commission Nurses and Midwives Certified Agreement 2018, Nurse unit manager, pay point 2 [E9] |
| Intensive care unit nurse | $40.09 | $39.64 | $44.46 | (1) Nurses and Midwives (Victorian Public Sector) (Single Interest Employers) Enterprise Agreement 2020-2024, Registered nurse, grade 2 year 4 (ICU nurse equivalent) [E7]  (2) New South Wales Industrial Relations Commission Public Health System Nurses’ and Midwives’ Award 2019, Registered nurse, year 4 [E8]  (3) Queensland Industrial Relations Commission Nurses and Midwives Certified Agreement 2018, Registered nurse, year 4 [E9] |
| Allied health personnel | $49.66 | $53.00 | $44.60 | (1) Allied Health Professionals (Victorian Public Sector) Enterprise Agreement 2020-2021, Allied health personnel 1, grade 3 year 1 [E10]  (2) New South Wales Industrial Relations Commission, Health Service Health Professionals Award 2019, Allied health personnel, level 3 year 1 [E11]  (3) Queensland Industrial Relations Commission Public Health Sector Certified Agreement 2019, Allied health personnel, level 3 year 1 [E12] |
| Clinical perfusionist | $102.98 | $75.13 | $40.78 | (1) Victorian Public Health Sector (Medical Scientists, Pharmacists and Psychologists) Single Interest Enterprise Agreement 2017 - 2021, Clinical perfusionist, grade 3 year 1 [E13]  (2) Health New South Wales, Health Employees’ Technical Award 2024, Clinical perfusionist, grade 3 year 1 [E14]  (3) Queensland Industrial Relations Health Practitioners and Dental Officers Award – State 2015, Health practitioner, level 3 year 1 [E15] |
| Wards person | - | $27.74 | $30.60 | (1) Not available  (2) New South Wales Industrial Relations Commission, Health Employees’ Award 2019 [E16]  (3) Queensland Public Health Sector Certified Agreement (No. 10) 2019, Operational role, level 2, year 1 [E17] |
| ECMO coordinator | Hospital A: $11.99  Hospitals B and C: $65.38 | Hospital D: $27.60  Hospital E: $35.92 | Hospital F: $61.09 | Yearly cost of ECMO coordinator (assuming two ECMO nurse roles for 24 hours a day 7 days a week) divided by the total number of ICU days for ECMO patients at each site. |
| *Blood products, per unit* |  |  |  |  |
| Whole blood red cells leucodepleted | $384.73 | | | National Blood Authority Annual Report 2021-22. [E18] The proportion of apheresis products were derived from the Australian Massive Transfusion Database, assuming the proportions to be 30% of platelets, 55% of fresh frozen plasma and 40% of cryoprecipitate. |
| Whole blood platelet pool leucodepleted | $258.33 | | |
| Apheresis platelet leucodepleted | $630.19 | | |
| Whole blood clinical fresh frozen plasma | $157.55 | | |
| Apheresis clinical fresh frozen plasma | $242.92 | | |
| Whole blood cryoprecipitate | $170.59 | | |
| Apheresis cryoprecipitate | $416.51 | | |
| Prothrombinex | $291.13 | | |
| Fibrinogen concentrate | $833.93 | | |
| Albumin - 20% 100mL, 4% 500mL | $64.00 | | |
| Factor VII - 1mg | $1,351.11 | | |
| Factor VII - 5mg | $6,755.55 | | |
| Factor VII - 8mg | 10,808.88 | | |
| *Emergency department costs, total* | | | | |
| Major respiratory conditions Complexity level A | $2,016.40 | | | National Hospital Cost Data Collection (NHCDC) Public Sector 2021–22 Admitted Acute Care Cost Weights for AR-DRG Version 11.0 (AECC code E0410A). Correlated ECMO indication is Respiratory. [E19] |
| Arrhythmia and cardiac arrest Complexity level A | $1,468.52 | | | National Hospital Cost Data Collection (NHCDC) Public Sector 2021–22 Admitted Acute Care Cost Weights for AR-DRG Version 11.0 (AECC code E0520A). Correlated ECMO indication is ECPR. [E19] |
| Circulatory disorders, other Complexity level A | $1,800.77 | | | National Hospital Cost Data Collection (NHCDC) Public Sector 2021–22 Admitted Acute Care Cost Weights for AR-DRG Version 11.0 (AECC code E0590A). Correlated ECMO indication is Cardiac. [E19] |
| *Ward costs, per day* |  | | |  |
| Acute care | $2,376.77 | | | National Hospital Cost Data Collection (NHCDC) Public Sector 2021–22 Admitted Acute Care Cost Weights for AR-DRG Version 11.0 (Acute cost weights V11) [E19] |
| *Intensive care unit costs, per day* | | | | |
| Adult, 0 organ supports | $4,077.71 | | | Using the National Schedule of NHS Costs 2019/20, a UK National Average Unit Cost per adult ICU patient per day was calculated as the average daily cost for surgical and medical adult patients (unspecified specialties). [E20] A weighted factor for each number of organ supports was determined by the proportion of each group’s average daily cost to the overall average daily cost across all groups. This factor was then multiplied by $4,875, the average daily Australian ICU cost reported by Hicks et al. [E1] [E2] |
| Adult, 1 organ supports | $4,124.74 | | |
| Adult, 2 organ supports | $6,506.17 | | |
| Adult, 3 organ supports | $6,619.87 | | |
| *Rehabilitation costs, per day* | | | | |
| General ECMO | $1,234.72 | | | Using the Australian National Subacute and Non-acute Patient Classification 2021/22, an average cost per day was calculated for Cardiac, Pain syndromes, and Pulmonary, Weighted FIM Motor 38 – 65 (AN-SNAP code 5A32) [E21] |
| Stroke | $1,352.56 | | | Using the Australian National Subacute and Non-acute Patient Classification 2021/22, a weighted average cost per day was calculated for Stroke (AN-SNAP codes 5AA1-5AA8) [E21] |
| Amputation of limb | $1,278.83 | | | Using the Australian National Subacute and Non-acute Patient Classification 2021/22, an average cost per day was calculated for Amputation of limb (AN-SNAP code 5AE1) [E21] |
| Spinal cord dysfunction | $1,566.80 | | | Using the Australian National Subacute and Non-acute Patient Classification 2021/22, a weighted average cost per day was calculated for Spinal cord dysfunction (AN-SNAP codes 5AD1-5AD3) [E21] |
| *Procedure costs, total* |  | | |  |
| Central cannulation | $42,754.23 | | | Based on data from centrally cannulated patients at the Alfred Hospital and St Vincent’s Sydney Hospital |
| Central decannulation | $8,217.27 | | |
| Peripheral cannulation (VA/ ECPR, with backflow cannula) | $8,186.67 | | | Calculated based on staffing costs sourced from multi-site survey and equipment costs from six major sites |
| Peripheral cannulation (VV, no backflow cannula) | $8,098.06 | | |
| Peripheral cannulation (VA/ECPR, no backflow cannula) | $8,045.44 | | |
| Peripheral decannulation | $477.88 | | |
| Circuit change | $4,806.49 | | |
| Cannula change | $7,148.25 | | |

Costs were converted using Consumer Price Index and are reported in 2021/22 Australian Dollars. [E22] Staffing costs were weighted by the proportion of ECMO patients in the EXCEL data in each state.

# **References**

| [E1] | National Health Service. National Cost Collection: National Schedule of NHS costs - Year 2019-20 - NHS trust and NHS foundation trusts. National Health Service, London, 2021. |
| --- | --- |
| [E2] | Hicks, P. The financial cost of intensive care in Australia: a multicentre registry study. Med J Aust. 2019;211(7):324-325. |
| [E3] | Australian Medical Association Victoria. Medical Specialists Enterprise Agreement 2018-2021 [Online]. 2018 July 31. Available from: <https://amavic.com.au/files/MEDICAL%20SPECIALISTS%20ENTERPRISE%20AGREEMENT%202018-2021.pdf> |
| [E4] | New South Wales Industrial Relations Commission. Staff Specialists (State) Award 2019 [Online]. 2019 November 30. Available from: <http://www.lawlink.nsw.gov.au/irc/IRCGazette.nsf/LUPublications/AE7975459CCE2EDBCA2584A40016C0B1?OpenDocument> |
| [E5] | Queensland Industrial Relations Commission. Medical Officers' (Queensland Health) Certified Agreement [Online]. 2019 May 31. Available from: <https://www.qirc.qld.gov.au/sites/default/files/2019_cb34.pdf> |
| [E6] | New South Wales Industrial Relations Commission. Health Professional and Medical Salaries (State) Award 2019 [Online]. 2019 December 23. Available from: <http://www.lawlink.nsw.gov.au/irc/IRCGazette.nsf/LUPublications/D38CEAE3A98869F0CA2584D90009597B?OpenDocument> |
| [E7] | Australian Nursing and Midwifery Foundation (Victorian Branch). Nurses and Midwives (Victorian Public Sector) (Single Interest Employers) Enterprise Agreement 2020-2024 [Online]. 2020 December 31. Available from: <https://www.anmfvic.asn.au/~/media/files/anmf/eba%202020/campaign%20updates/200120-NandM-EBA-master-clean.pdf> |
| [E8] | New South Wales Industrial Relations Commission. Public Health System Nurses' and Midwives' (State) Award 2019 [Online]. 2020 March 20. Available from: <http://www.lawlink.nsw.gov.au/irc/ircgazette.nsf/LUPublications/130E3FB6E91F4754CA25853400212CFA?OpenDocument> |
| [E9] | Queensland Industrial Relations Commission. Nurses and Midwives (Queensland Health and Department of Education) [Online]. 2020 June 22. Available from: <https://www.qirc.qld.gov.au/sites/default/files/2020_cb44.pdf> |
| [E10] | Victorian Allied Health Profressionals Association. Allied Health Professionals (Victorian Public Sector) (Single Interest Employers) Enterprise Agreement 2021-2026 [Online]. 2022 December 15. Available from: <https://vahpa.asn.au/wp-content/uploads/2023/01/AHP-Vic-Public-Sector-Single-Interest-Employers-EA-2021-26.pdf> |
| [E11] | New South Wales Industrial Relations Commission. NSW Health Service Health Professionals (State) Award 2019 [Online]. 2019 November 1. Available from: <http://www.lawlink.nsw.gov.au/irc/IRCGazette.nsf/LUPublications/87FE759AC21DA026CA2584A4001678CF?OpenDocument> |
| [E12] | Queensland Industrial Relations Commission. Queensland Public Health Sector Certified Agreement (No. 10) 2019 [Online]. 2020 August 13. Available from: <https://www.qirc.qld.gov.au/sites/default/files/2020_cb51.pdf> |
| [E13] | Victorian Hospitals' Industrial Association. Victorian Public Health Sector (Medical Scientists, Pharmacists and Psychologists) Single Interest Enterprise Agreement 2017 – 2021 [Online]. 2017 December 21. Available from: <https://www.westernhealth.org.au/Careers/Documents/Awards/MedSci_Pharm_Psych/Med%20Scientist-Pharmacists%20and%20Psych%20EA%202017-2021.pdf> |
| [E14] | New South Wales Industrial Relations Commission. Health New South Wales, Health Employees’ Technical Award 2024 [Online]. 2024 November 26. Available from: <https://www.health.nsw.gov.au/careers/conditions/Awards/hsu-he-technical.pdf> |
| [E15] | Queensland Industrial Relations Commission. Health Employees’ Technical (State) Award 2024 [Online]. 2021 September 1. Available from: <https://www.qirc.qld.gov.au/sites/default/files/health_practitioners_010921.pdf?v=1630534322> |
| [E16] | New South Wales Industrial Relations Commission. Health Employees' Conditions of Employment (State) Award 2019 [Online]. 2019 November 1. Available from: <http://www.lawlink.nsw.gov.au/irc/IRCGazette.nsf/LUPublications/E807B52EF8719CC6CA2584A400154EC3?OpenDocument> |
| [E17] | Queensland Industrial Relations Commission. Queensland Public Health Sector Certified Agreement (No. 10) 2019 [Online]. 2020 August 13. Available from: <https://www.qirc.qld.gov.au/sites/default/files/2020_cb51.pdf> |
| [E18] | Australian Government. National Blood Authority Annual Report 2021-22. Australian Government, Canberra, 2022. |
| [E19] | Independent Health and Aged Care Pricing Authority. National Hospital Cost Data Collection (NHCDC) Public Sector 2021–22 [Online]. 2020 March 1. Available from: <https://www.ihacpa.gov.au/resources/national-hospital-cost-data-collection-nhcdc-public-sector-2021-22> |
| [E20] | NHS England. 2019/20 National Cost Collection Data Publication [Online]. 2021 June 22. Available from: <https://www.england.nhs.uk/publication/2019-20-national-cost-collection-data-publication/> |
| [E21] | Independent Health and Aged Care Pricing Authority. Australian National Subacute and Non-Acute Patient Classification Version 5.0 [Online]. 2021 December 17. Available from: <https://www.ihacpa.gov.au/resources/australian-national-subacute-and-non-acute-patient-classification-version-50> |
| [E22] | Australian Bureau of Statistics. Consumer Price Index, Australia [Online]. 2025 March 1. Available from: <https://www.abs.gov.au/statistics/economy/price-indexes-and-inflation/consumer-price-index-australia/latest-release> |
