# Supplementary material for: Costs and Complications of Extracorporeal Membrane Oxygenation Therapy in Australia and New Zealand
Source: Research Square preprint supplement (doi:10.21203/rs.3.rs-8586173/v1), 2026-01-22
Supplement: Supplementary file 5 [file d322c60071b8c1bd24d397af.docx]

Costs and Complications of Extracorporeal Membrane Oxygenation Therapy in Australia and New Zealand

Dr Kate R. Wilcox, Ms Alayna Carrandi, Dr Aidan Burrell, Mr Bentley Fulcher, Professor Carol L. Hodgson, Dr Alisa M. Higgins on behalf of the EXCEL management committee

# **Additional File 5: Supplementary Tables**

| **eTable 1: Patient Demographics – Survivors to Hospital Discharge Only**  | *Demographics* | *Overall N = 762* | *VA ECMO N = 352* | *VV ECMO N = 325* | *ECPR N = 85* | *P value* | | --- | --- | --- | --- | --- | --- | | Age, years | 49 (37 – 59) | 52 (39 – 62) | 46 (34 – 54) | 52 (43 – 61) | < 0.001 | | Sex, male | 509 (67%) | 232 (66%) | 209 (64%) | 68 (80%) | 0.021 | | Total days in hospital | 38 (23 – 61) | 39 (25 – 60) | 42 (23 – 67) | 30 (20 – 50) | 0.004 | | Total days in ICU | 21 (12 – 38) | 19 (12 – 31) | 28 (14 – 48) | 16 (10 – 23) | < 0.001 | | Total days on ECMO | 6 (4 – 11) | 5 (4 – 9) | 9 (5 – 17) | 5 (3 – 7) | < 0.001 |   Data are presented as median (IQR) for continuous measures and n (%) for categorical measures. Please note that some of the above data are presented in the main costing paper.  ECMO=Extracorporeal membrane oxygenation; ECPR=Extracorporeal cardiopulmonary resuscitation; ICU=Intensive care unit; VA=Venoarterial; VV=Venovenous **eTable 2: Total Patient Costs by ECMO Mode**  | *Cost category* | *Overall*  *Mean cost (SD)*  *N = 1,345* | *VA ECMO  Mean cost (SD) N = 615* | *VV ECMO Mean cost (SD) N=464* | *ECPR Mean cost (SD) N = 266* | *P value* | | --- | --- | --- | --- | --- | --- | | Total patient cost | $221,452 ($201,787) | $215,128 ($162,418) | $287,264 ($251,193) | $121,274 ($131,893) | < 0.001 | | Retrieval cost | $4,059 ($5,081) | $4,301 ($5,017) | $5,118 ($5,536) | $1,652 ($3,345) | < 0.001 | | Emergency department cost | $345 ($706) | $212 ($581) | $412 ($814) | $536 ($708) | < 0.001 | | Intensive care cost | $157,122 ($170,698) | $139,962 ($128,464) | $224,189 ($222,102) | $79,810 ($93,784) | < 0.001 | | Ward cost | $31,391 ($58,960) | $36,714 ($54,236) | $32,491 ($63,836) | $17,165 ($58,520) | < 0.001 | | Procedure cost | $17,767 ($17,071) | $21,062 (21,140) | $15,318 (11,533) | $14,421 ($12,772) | < 0.001 | | Trips cost | $265 ($578) | $323 ($624) | $196 ($513) | $249 ($564) | 0.001 | | Blood cost | $6,417 ($8,745) | $8,088 ($9,638) | $5,246 ($8,367) | $4,596 ($6,175) | < 0.001 | | Rehabilitation cost | $4,087 ($16,156) | $4,467 ($15,446) | $4,294 ($17,510) | $2,846 (15,274) | 0.37 |   ECPR=Extracorporeal cardiopulmonary resuscitation; SD=Standard deviation; VA=Venoarterial; VV=Venovenous **eTable 3: Patient Costs by ECMO Mode - From ECMO Commencement Only**  | *Cost category* | *Overall Mean cost (SD) N = 1,345* | *VA ECMO  Mean cost (SD) N = 615* | *VV ECMO Mean cost (SD) N=464* | *ECPR Mean cost (SD) N = 266* | *P value* | | --- | --- | --- | --- | --- | --- | | Total patient cost | $202,479 ($191,153) | $197,241 ($156,180) | $259,141 ($237,882) | $115,749 ($129,118) | < 0.001 | | Retrieval cost | $1,834 ($3,709) | $1,592 ($3,367) | $2,852 ($4,589) | $620 ($1,817) | < 0.001 | | Emergency department cost | $33 ($241) | $23 ($204) | $39 ($278) | $44 ($251) | 0.04 | | Intensive care unit cost | $150,072 ($165,308) | $135,684 ($127,977) | $209,522 ($214,381) | $79,635 ($93,267) | < 0.001 | | Ward cost | $23,416 ($48,097) | $27,567 ($45,369) | $23,051 ($44,654) | $14,457 ($57,955) | < 0.001 | | Procedure cost | $17,767 ($17,071) | $21,062 ($21,140) | $15,318 ($11,533) | $14,421 ($12,772) | < 0.001 | | Intra-hospital trips cost | $265 ($578) | $324 ($623) | $196 ($513) | $249 ($564) | 0.001 | | Blood product cost | $6,417 ($8,745) | $8,088 ($9,638) | $5,246 ($8,367) | $4,596 ($6,175) | < 0.001 | | Rehabilitation cost | $2,675 ($8,362) | $2,902 ($6,667) | $2,918 ($11,247) | $1,727 ($5,430) | 0.12 | |
| --- | --- | --- | --- | --- | --- | --- | --- | --- | --- | --- | --- | --- | --- | --- | --- | --- | --- | --- | --- | --- | --- | --- | --- | --- | --- | --- | --- | --- | --- | --- | --- | --- | --- | --- | --- | --- | --- | --- | --- | --- | --- | --- | --- | --- | --- | --- | --- | --- | --- | --- | --- | --- | --- | --- | --- | --- | --- | --- | --- | --- | --- | --- | --- | --- | --- | --- | --- | --- | --- | --- | --- | --- | --- | --- | --- | --- | --- | --- | --- | --- | --- | --- | --- | --- | --- | --- | --- | --- | --- | --- | --- | --- | --- | --- | --- | --- | --- | --- | --- | --- | --- | --- | --- | --- | --- | --- | --- | --- | --- | --- | --- | --- | --- | --- | --- | --- | --- | --- | --- | --- | --- | --- | --- | --- | --- | --- | --- | --- | --- | --- | --- | --- | --- | --- | --- | --- | --- | --- | --- | --- | --- | --- | --- | --- | --- | --- | --- | --- | --- | --- | --- | --- | --- | --- | --- | --- |

ECPR=Extracorporeal cardiopulmonary resuscitation; SD=Standard deviation; VA=Venoarterial; VV=Venovenous

| **eTable 4: Cost Ratios of Comparative Mixed Effects Generalised Linear Models**  | *Model Name* | *Cost Ratio (95% CI)* | | --- | --- | | Total Patient Cost by ECMO Mode,  VA ECMO vs. VV ECMO * | 1.30 (1.19 – 1.43) | | Total Patient Cost by ECMO Mode,  VA ECMO vs. VV ECMO (Survivors Only) * | 1.16 (1.05 – 1.28) | | Total Patient Cost by ECMO Mode,  ECPR vs. VA ECMO * | 0.57 (0.51 – 0.63) | | Total Patient Cost by ECMO Mode,  VA ECMO vs. ECPR (Survivors Only) * | 0.80 (0.69 – 0.93) | | Total Patient Cost by Number of Complications, 0 vs. 1 ** | 1.48 (1.32 – 1.65) | | *Adjusted for hospital length of stay*** | 1.24 (1.16 – 1.33) | | Total Patient Cost by Number of Complications, 0 vs. 2 ** | 1.67 (1.47 – 1.91) | | *Adjusted for hospital length of stay*** | 1.29 (1.19 – 1.40) | | Total Patient Cost by Number of Complications, 0 vs. 3 ** | 1.93 (1.66 – 2.24) | | *Adjusted for hospital length of stay*** | 1.36 (1.23 – 1.49) | | Total Patient Cost by Number of Complications, 0 vs. ≥4 ** | 2.09 (1.88 – 2.33) | | *Adjusted for hospital length of stay*** | 1.41 (1.31 – 1.51) | | Total Patient Cost by Complication, 0 vs. ≥1** | 1.78 (1.64 – 1.94) | | *Adjusted for hospital length of stay*** | 1.32 (1.25 – 1.39) |   CI=Confidence interval; ECMO=Extracorporeal membrane oxygenation; ECPR=Extracorporeal cardiopulmonary resuscitation; VA=Venoarterial; VV=Venovenous  *Adjusted for age, sex, Charlson comorbidity index  **Adjusted for age, sex, Charlson comorbidity index, ECMO mode |
| --- | --- | --- | --- | --- | --- | --- | --- | --- | --- | --- | --- | --- | --- | --- | --- | --- | --- | --- | --- | --- | --- | --- | --- | --- | --- | --- | --- | --- | --- | --- |

## **eTable 5: Patient Cost by Key ECMO Complication**

| *Complication* | *Incidence*  *N (%)* | *Total patient cost with complication*  *Mean (SD)* | *Total patient cost without complication Mean (SD)* | *P Value* |
| --- | --- | --- | --- | --- |
| Infection | 616/1,345 (45.8%) | $292,197 ($217,806) | $161,674 ($165,175) | < 0.001 |
| Infection – survivors to hospital discharge | 397/762 (52.1%) | $324,948 ($235,133) | $227,362 ($186,676) | < 0.001 |
| Major bleeding | 124/1,345 (9.2%) | $230,423 ($140,860) | $220,541 ($206,996) | 0.60 |
| Major bleeding – survivors to hospital discharge | 66/762 (8.7%) | $269,308 ($124,855) | $279,047 ($225,594) | 0.73 |
| Cardiovascular | 152/1,345 (11.3%) | $237,276 ($163,340) | $219,436 ($206,142) | 0.30 |
| Cardiovascular – survivors to hospital discharge | 83/762 (10.9%) | $281,001 ($164,693) | $277,862 ($224,478) | 0.90 |
| Neurological | 47/1,345 (3.5%) | $154,207 ($134,178) | $223,887 ($203,434) | 0.02 |
| Neurological – survivors to hospital discharge | 11/762 (1.4%) | $313,422 ($174,396) | $277,688 ($219,306) | 0.59 |
| Acute kidney injury | 158/1,345 (11.8%) | $226,800 ($171,644) | $220,741 ($205,519) | 0.72 |
| Acute kidney injury – survivors to hospital discharge | 76/762 (10%) | $305,998 ($189,524) | $275,125 ($221,575) | 0.24 |

SD = Standard deviation

## **eTable 6: Patient Demographics – By Bridge to Transplant Diagnosis**

| *Demographics* | *Total patients N = 1,345* | *Not bridged to transplant*  *N = 1,317* | *Bridged to transplant N = 28* | *P value* |
| --- | --- | --- | --- | --- |
| Total days in hospital | 36 (39) | 36 (39) | 59 (49) | 0.002 |
| Total days in ICU | 23 (24) | 22 (24) | 35 (39) | 0.007 |
| Total days on ECMO | 10 (14) | 10 (15) | 9 (7) | 0.92 |
| Patients with at least one complication | 769 (57%) | 751 (57%) | 18 (64%) | 0.44 |

ICU=Intensive care unit

## **eTable 7: Patient Costs by Key ECMO Diagnoses**

| *Diagnosis* | *Total patients  (N)* | *Total patient cost Mean (SD)* |
| --- | --- | --- |
| Post-heart transplant | 40 | $299,804 ($179,194) |
| Post-lung transplant | 54 | $206,347 ($113,324) |
| Acute respiratory failure | 411 | $290,748 ($248,556) |
| Post-cardiac surgery | 222 | $215,852 ($151,315) |
| Bridge to transplant | 28 | $396,262 ($420,812) |

SD = Standard deviation
